# Supplementary material for: Hydroxyapatite conjugated graphene oxide nanocomposite: a new sight for significant applications in adsorption
Source: Royal Society of Chemistry journal article supplement (doi:10.1039/c5ra16022g), 2015-01-01
Supplement: c5ra16022g1.pdf [file c5ra16022g1.pdf]

## Supporting information

### Hydroxyapatite conjugated Graphene Oxide nanocomposite: A new sight for significant application in adsorption

Triveni Kumar Mahto, Subhas Chandra Pandey, Soumen Chandra, Amit Kumar, Sumanta kumar Sahu\*

*Department of Applied Chemistry, Indian School of Mines, Dhanbad 826004, Jharkhand, India*

\* To whom correspondence should be addressed. E-mail:[sumantchem@gmail.com](mailto:sumantchem@gmail.com),  
[sahu.s.ac@ismdhanbad.ac.in](mailto:sahu.s.ac@ismdhanbad.ac.in); Fax: +91-326-2307772; Tel: +91-326-2235936

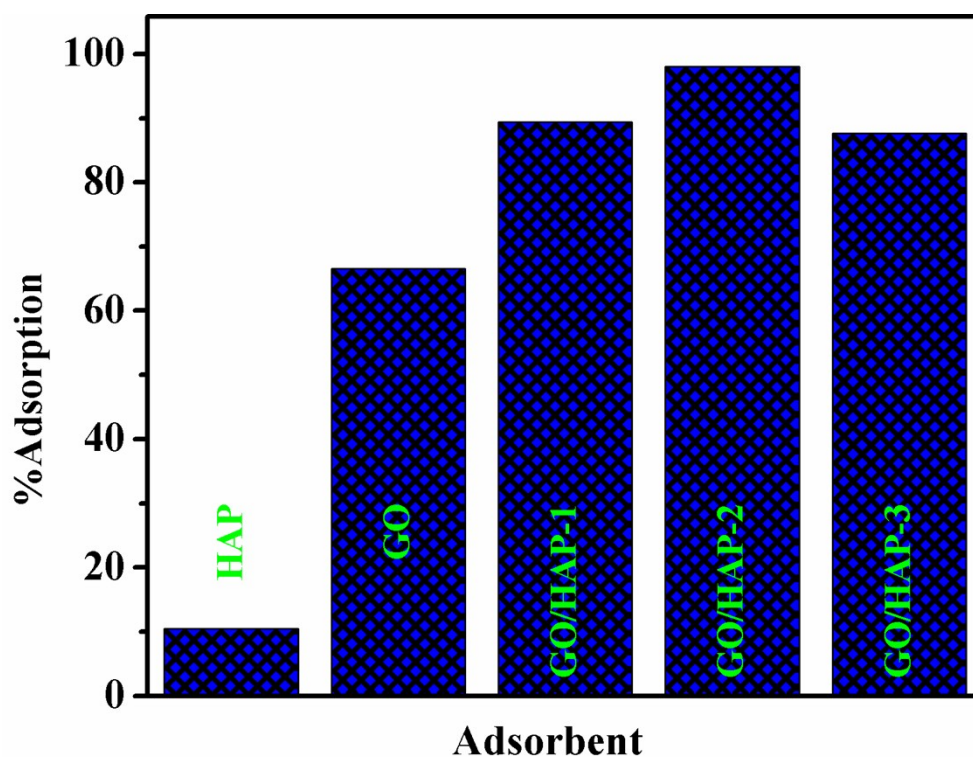

Fig. S1 Comparison among different adsorbents.

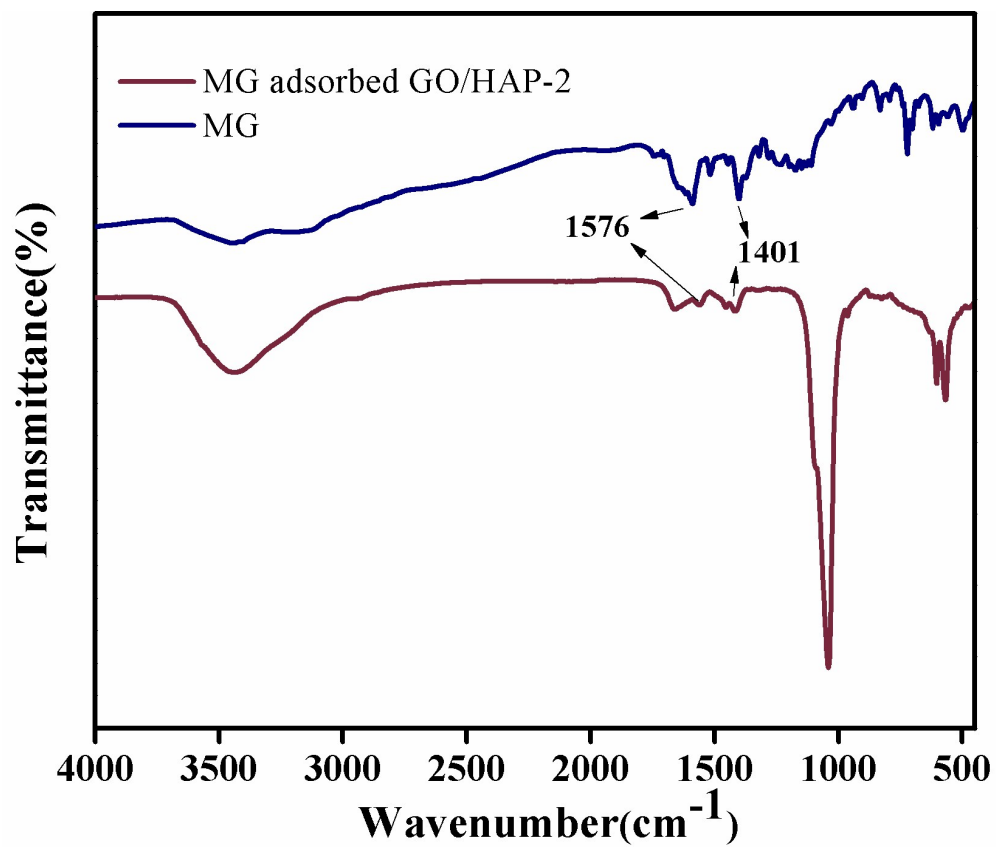

Fig. S2 Transmission FTIR spectra of MG and MG adsorbed GO/HAP-2 nanocomposite.

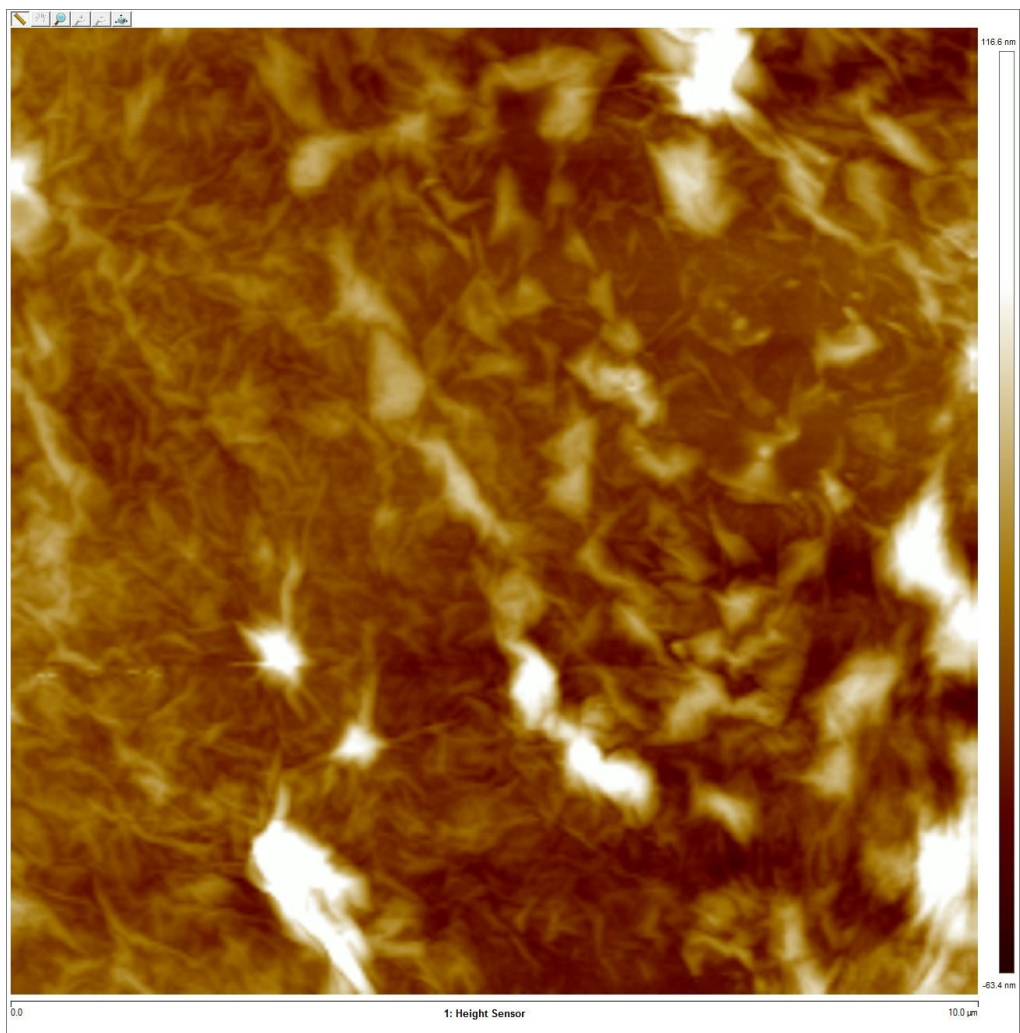

Fig. S3 AFM image of GO.

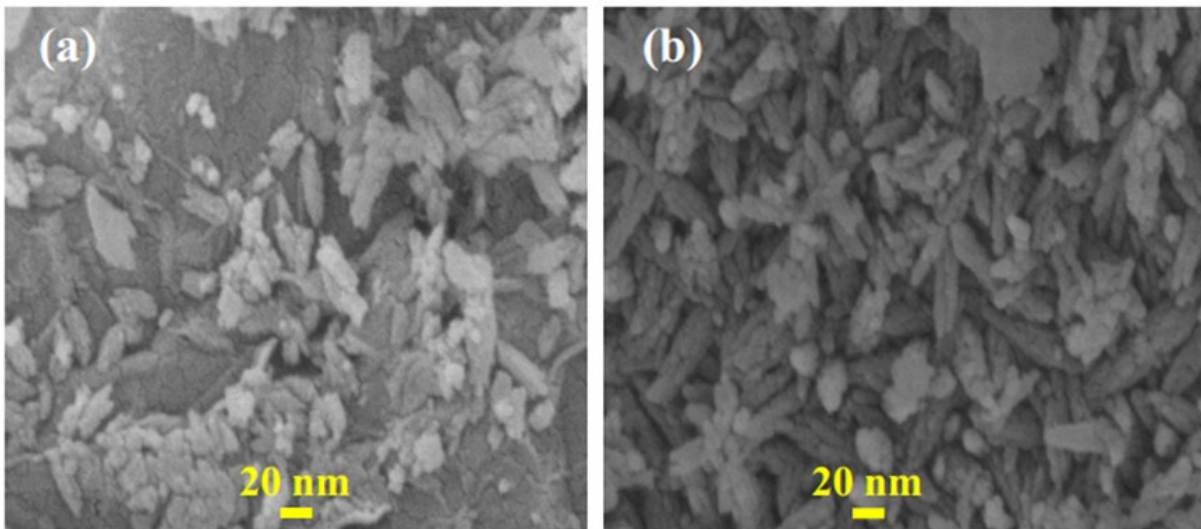

Fig.S4 High magnification FESEM image of GO/HAP-2 (a) and GO/HAP-3 (b) nanocomposites.

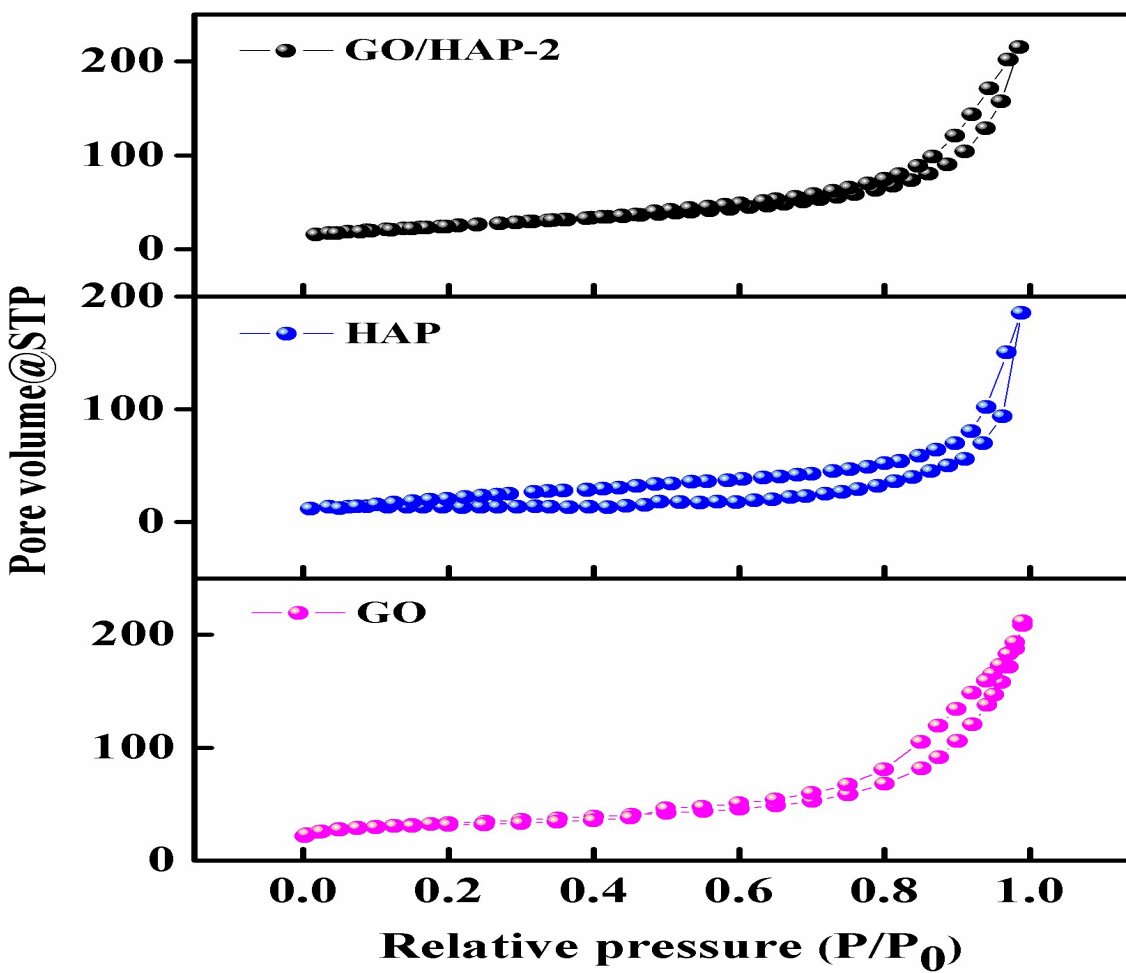

Fig. S5 N<sub>2</sub> adsorption and desorption isotherms of GO, HAP, and GO/HAP-2.

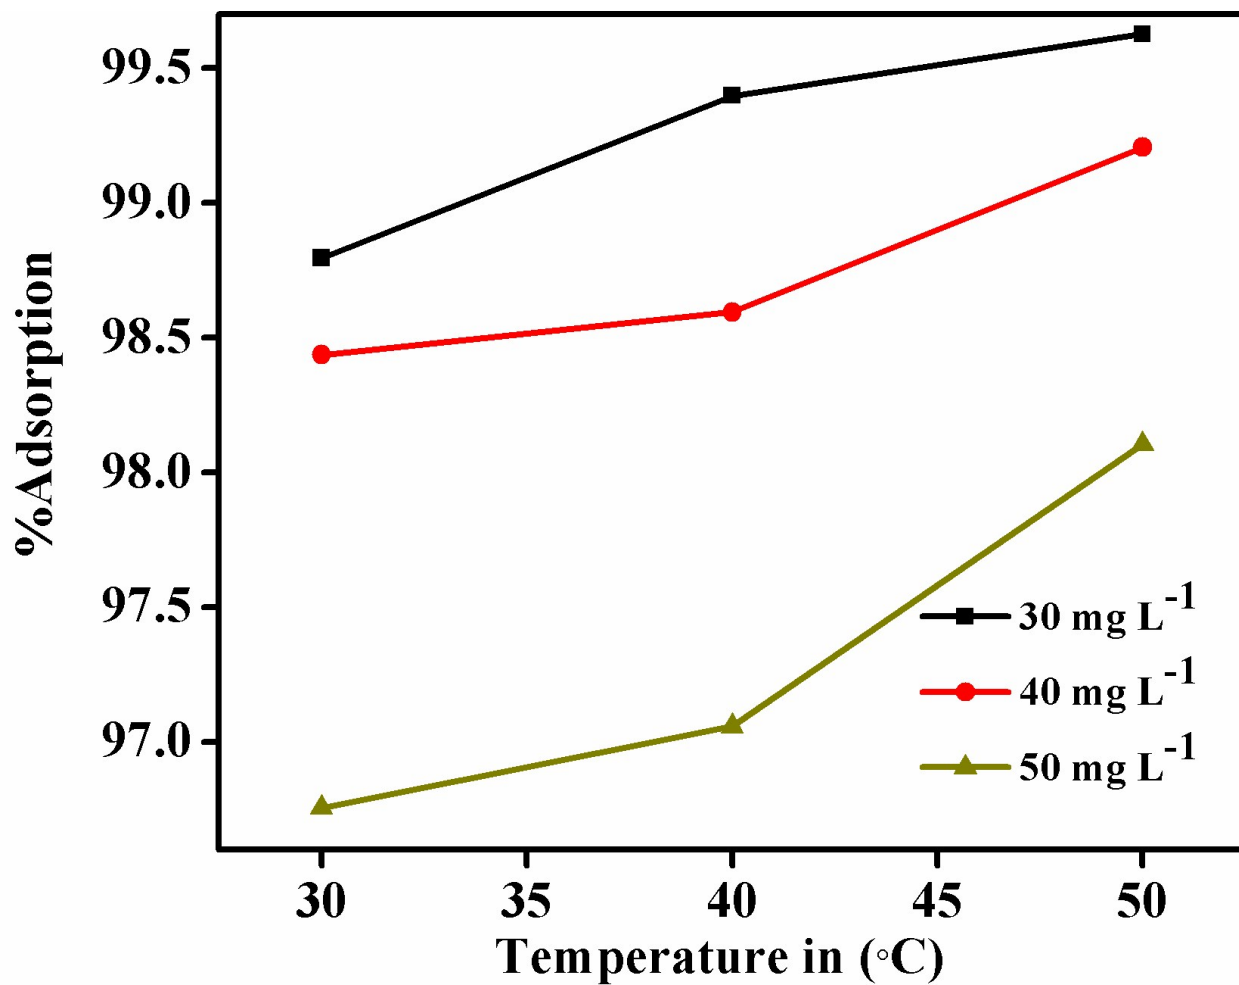

Fig. S6 Effect of temperature on the adsorption of MG. {GO/HAP-2: 0.01 g}.

T1. Textural properties of GO, HAP, and GO/HAP-2

| Sample description | Pore volume (cm <sup>3</sup> g <sup>-1</sup> ) | BET surface area (m <sup>2</sup> g <sup>-1</sup> ) |
|--------------------|------------------------------------------------|----------------------------------------------------|
| GO                 | 0.29                                           | 119.13                                             |
| HAP                | 0.28                                           | 39.02                                              |
| GO/HAP-2           | 0.33                                           | 91.18                                              |
